# Supplementary material for: Discovery of triazolyl thalidomide derivatives as anti-fibrosis agents
Source: Royal Society of Chemistry journal article supplement (doi:10.1039/d0nj03139a), 2021-01-01

## Supplementary Information

# Discovery of triazolyl thalidomide derivatives as anti-fibrosis agents

Kai-Wei Tang <sup>a, †</sup>, Wen-Li Hsu <sup>b, c, †</sup>, Cheng-Ru Chen <sup>d</sup>, Ming-Hsien Tsai <sup>e</sup>, Chia-Jung Yen <sup>c</sup>, Chih-Hua Tseng <sup>a, d, f, g, h, \*</sup>

<sup>a</sup> School of Pharmacy, College of Pharmacy, Kaohsiung Medical University, Kaohsiung 807, Taiwan

<sup>b</sup> Department of Dermatology, Kaohsiung Municipal Ta-Tung Hospital, Kaohsiung Medical University, Kaohsiung, 801, Taiwan

<sup>c</sup> Regenerative Medicine and Cell Therapy Research Center, Kaohsiung Medical University, Kaohsiung 807, Taiwan

<sup>d</sup> Department of Fragrance & Cosmetic Science, College of Pharmacy, Kaohsiung Medical University, Kaohsiung 807, Taiwan

<sup>e</sup> Department of Child Care, College of Humanities and Social Sciences, National Pingtung University of Science and Technology, Pingtung 91201, Taiwan

<sup>f</sup> Drug Development and Value Creation Research Center, Kaohsiung Medical University, Kaohsiung 807, Taiwan

<sup>g</sup> Department of Medical Research, Kaohsiung Medical University Hospital, Kaohsiung 807, Taiwan

<sup>h</sup> Department of Pharmacy, Kaohsiung Municipal Ta-Tung Hospital, Kaohsiung 801, Taiwan

\* Correspondence: [chihhua@kmu.edu.tw](mailto:chihhua@kmu.edu.tw) (C.-H.T.); Tel.: +886-7-3121101 (ext. 2163) (C.-H.T.); fax: +886-7-3125339 (C.-H.T.)

† These two authors contributed equally to this work.

**Table of Contents**

**Figure S1. Chemical structure of FDA approved drug mentioned in text.....3**

**Figure S2. Effect of thalidomide derivatives on SOCE activity in TGF- $\beta$ 1-induced myofibroblasts. ....3**

**Figure 3 (larger version).....4**

**NMR spectra..... 5**

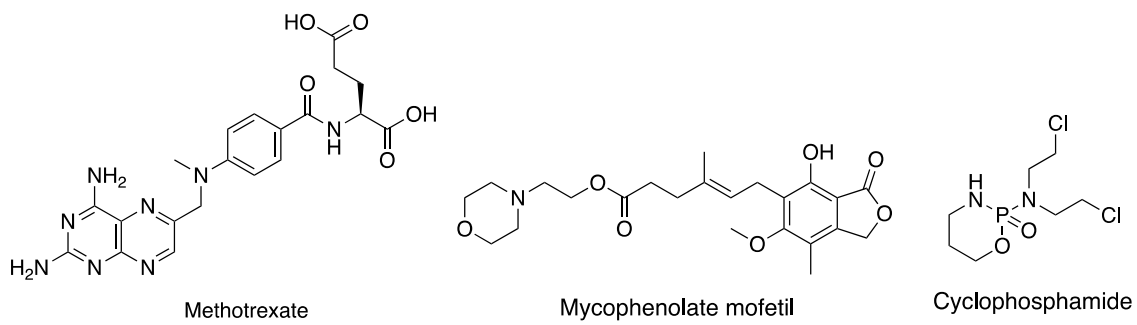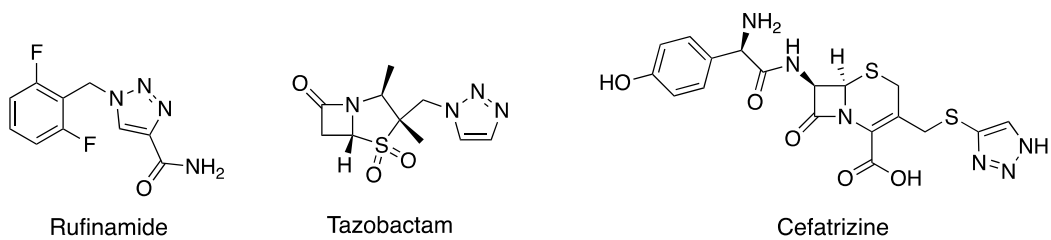

**Figure S1.** Chemical structure of FDA approved drug mentioned in text.

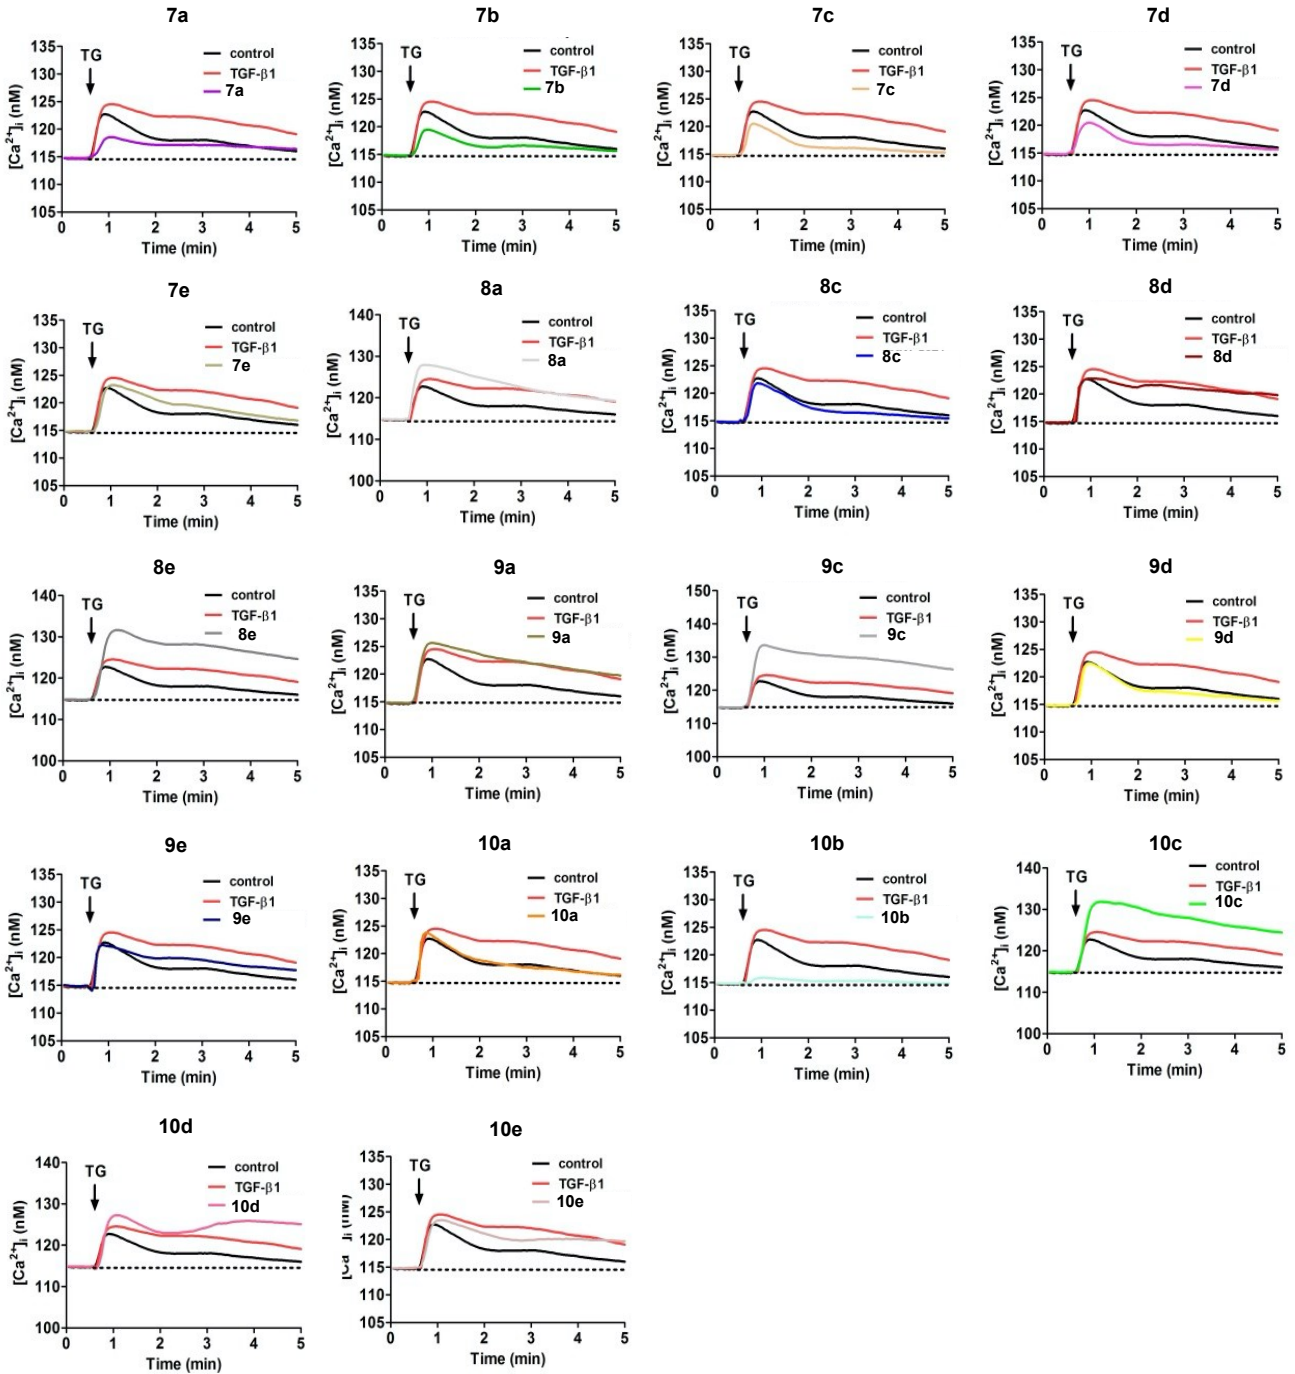

**Figure S2.** Effect of thalidomide derivatives on SOCE activity in TGF- $\beta$ 1-induced myfibroblasts. Fibroblasts were treated with TGF- $\beta$ 1 for 3 days to elicit myfibroblasts [34].  $\text{Ca}^{2+}$  imaging analysis of the thapsigargin (TG)-induced  $\text{Ca}^{2+}$  response after 30 min of pretreatment with each compound in TGF- $\beta$ 1-induced myfibroblasts. The control group was the  $\text{Ca}^{2+}$  imaging of fibroblasts (without TGF- $\beta$ 1 induced).

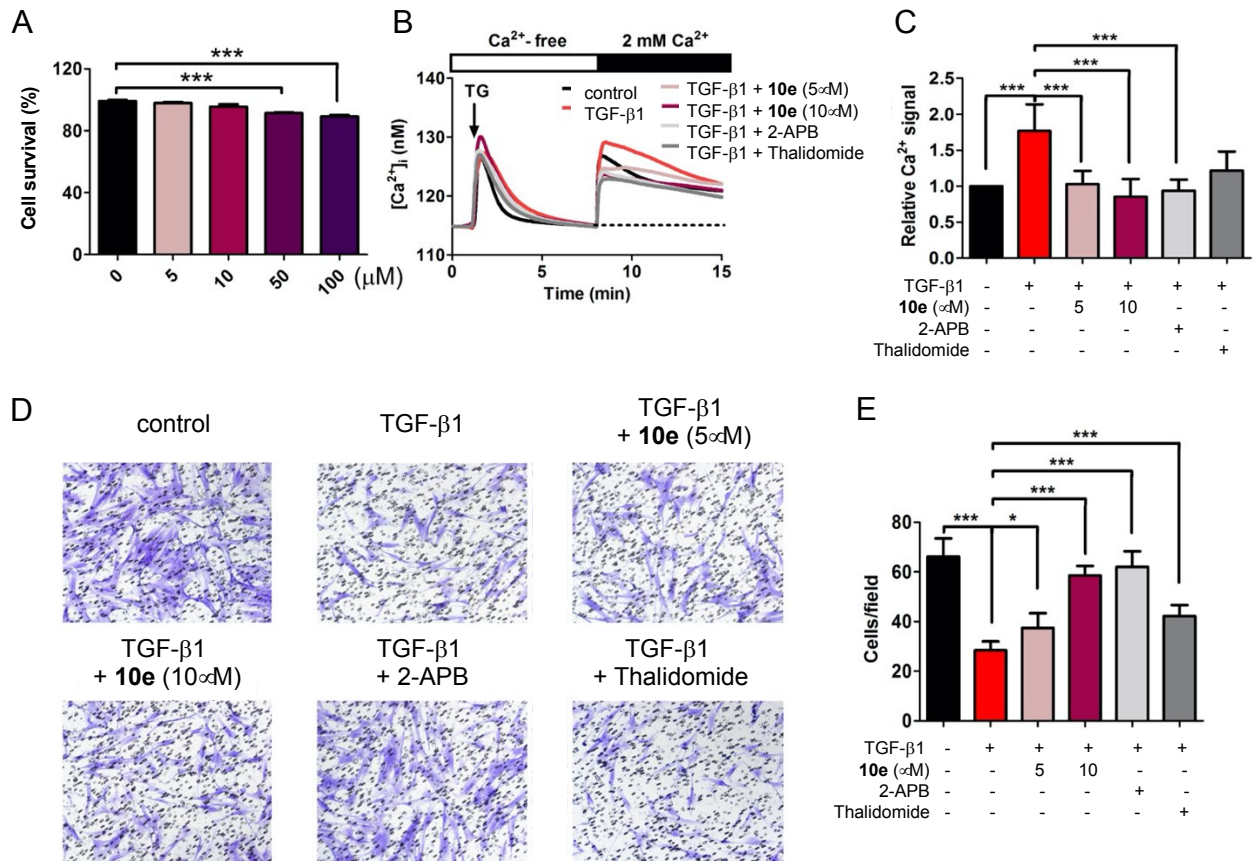

Figure 3 (larger version)

# NMR spectra

The integration of one proton was set to 10.

TKW-5657g  
Pulse Sequence: s2pu1  
UNITYplus-400 "unity400"  
Date: Oct 14 2016  
Solvent: DMSO  
Ambient Temperature  
Total 64 repetitions

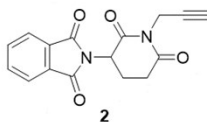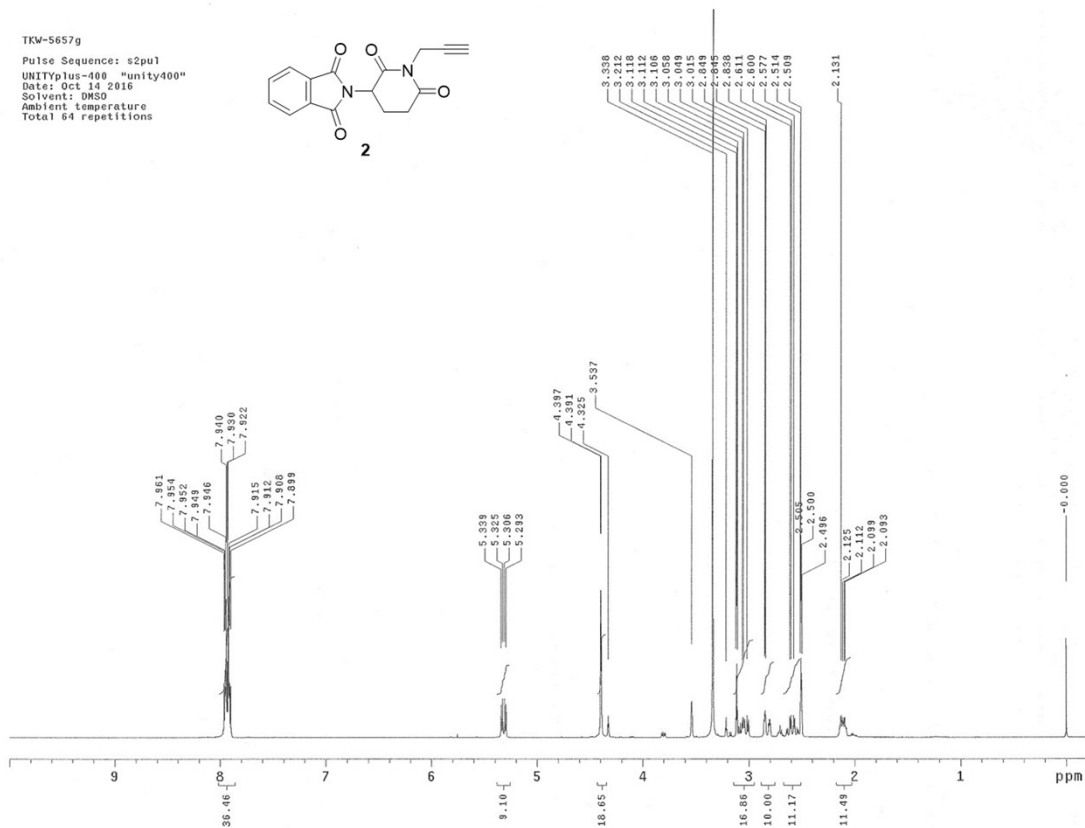

TKV-5657g  
 Pulse Sequence: s2pul  
 UNITYplus-400 "unity400"  
 Date: Oct 14 2016  
 Solvent: DMSO  
 Ambient temperature  
 Total 6336 repetitions

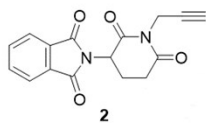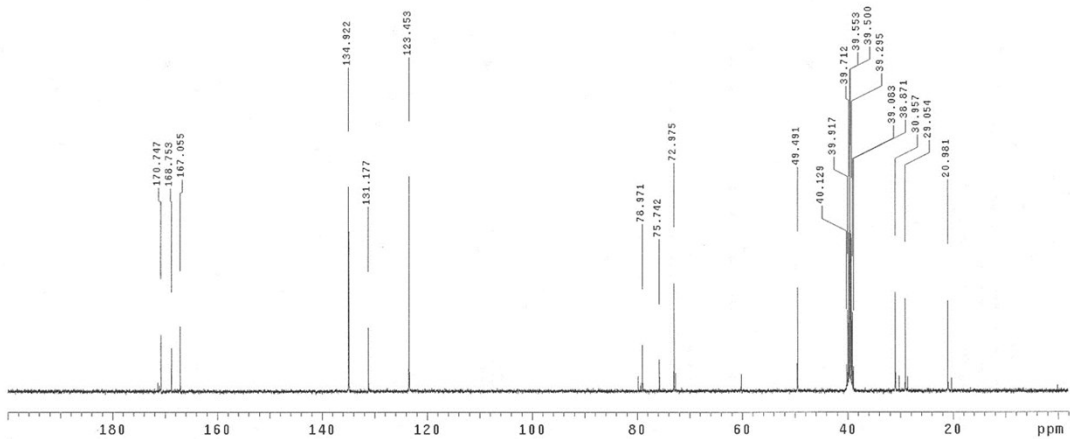

TKV-5656p

Pulse Sequence: s2pul  
 Mercury-400BB "MerPlus400"  
 Date: Jun 24 2016  
 Solvent: dmsO  
 Ambient temperature  
 Total 64 repetitions

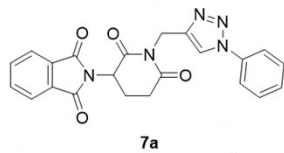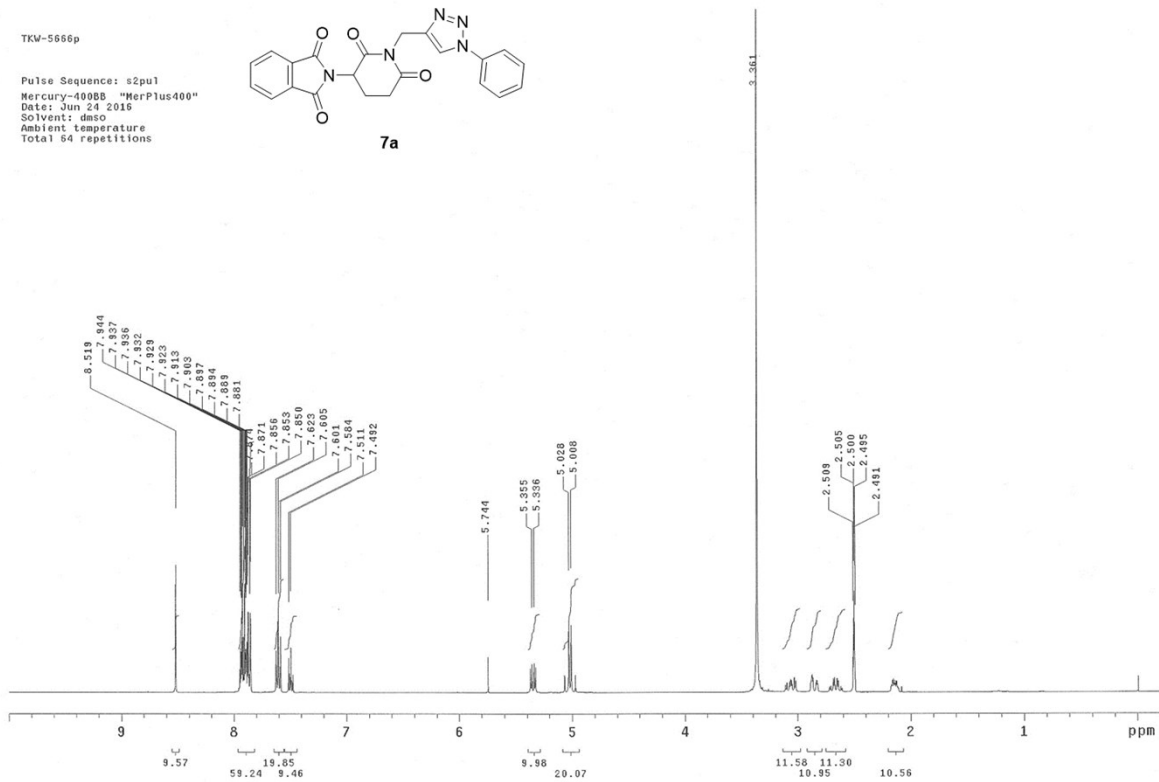

TKW-5666p

Pulse Sequence: s2pul  
Mercury-400BB "MerPlus400"  
Date: Jun 24 2016  
Solvent: dms  
Ambient temperature  
Total 912 repetitions

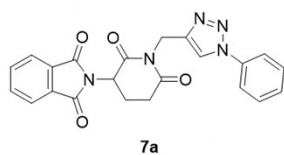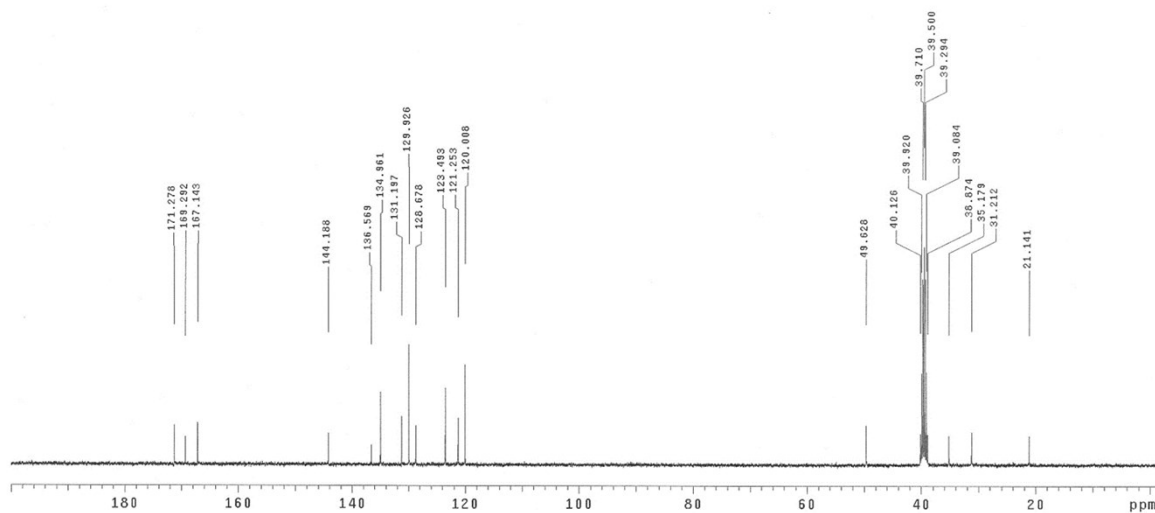

TKW-5667q

Pulse Sequence: s2pul  
Mercury-400BB "MerPlus400"  
Date: Jun 24 2016  
Solvent: dms  
Ambient temperature  
Total 64 repetitions

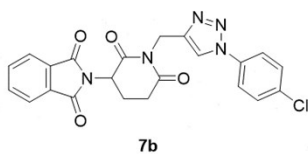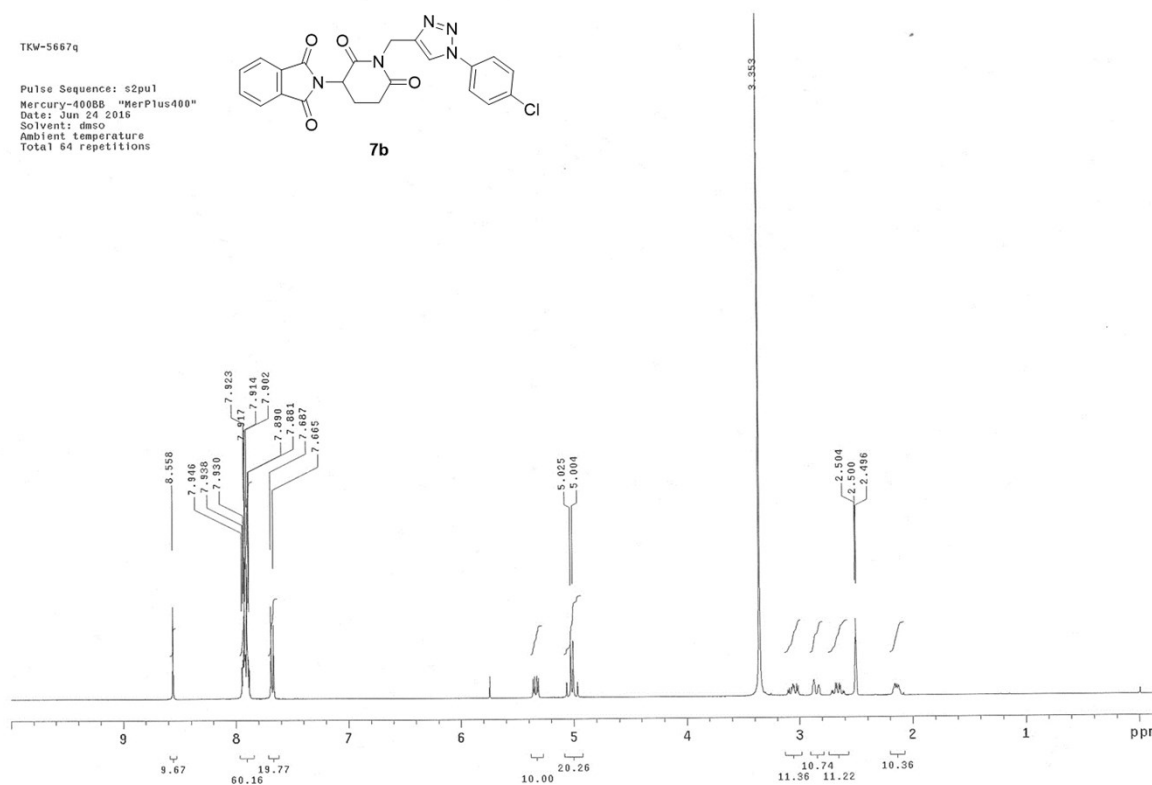



TKW-5667q

Pulse Sequence: s2pu1  
Mercury-400BB "MerPlus400"  
Date: Jun 24 2016  
Solvent: dmsc  
Ambient temperature  
Total 1056 repetitions

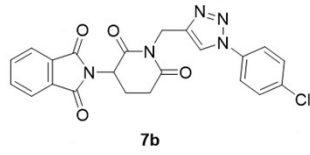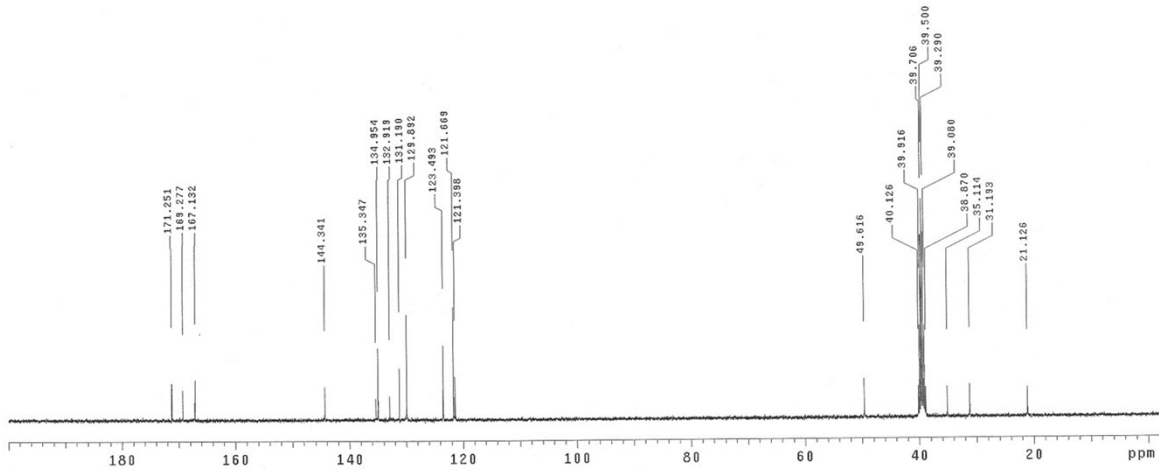

TKW-5668r

Pulse Sequence: s2pu1  
UNITYplus-400 "unity400"  
Date: Aug 17 2016  
Solvent: DMSO  
Ambient temperature  
Total 64 repetitions

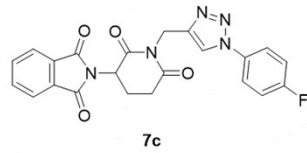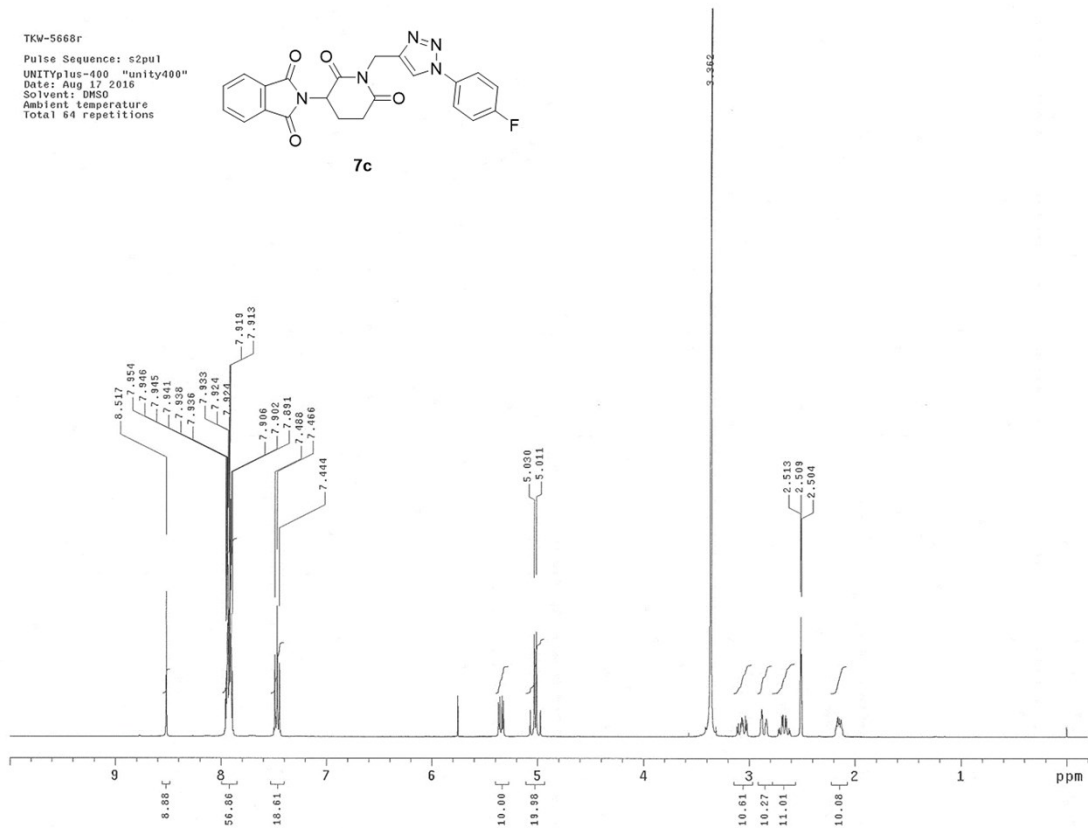

TKW-5668r  
 Pulse Sequence: c2pu  
 UNITYplus-400 "unity400"  
 Date: Aug 17 2016  
 Solvent: DMSO  
 Ambient Temperature  
 Total 3840 repetitions

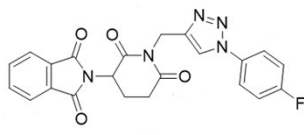

7c

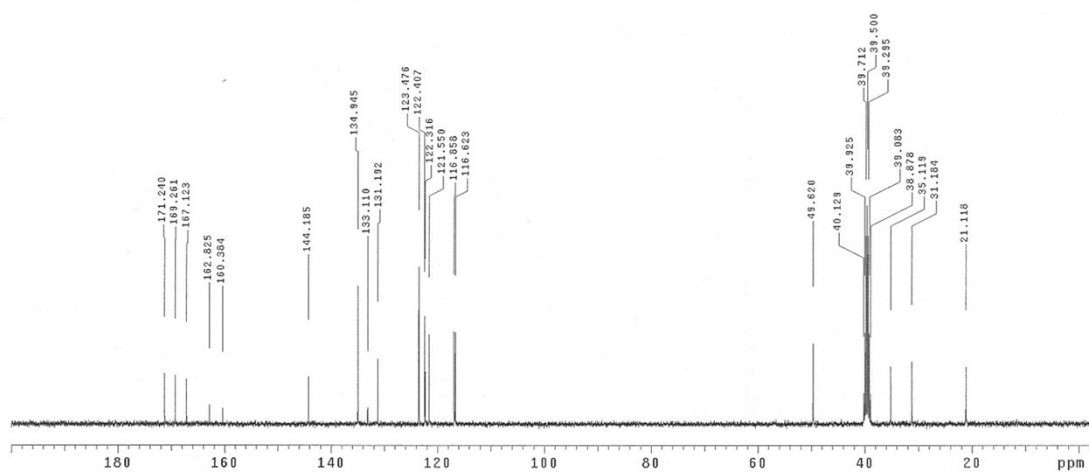

TKW-5668s  
 Pulse Sequence: s2pu1  
 UNITYplus-400 "unity400"  
 Date: Aug 17 2016  
 Solvent: DMSO  
 Ambient Temperature  
 Total 64 repetitions

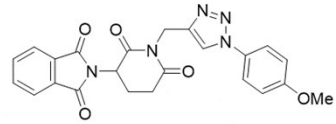

7d

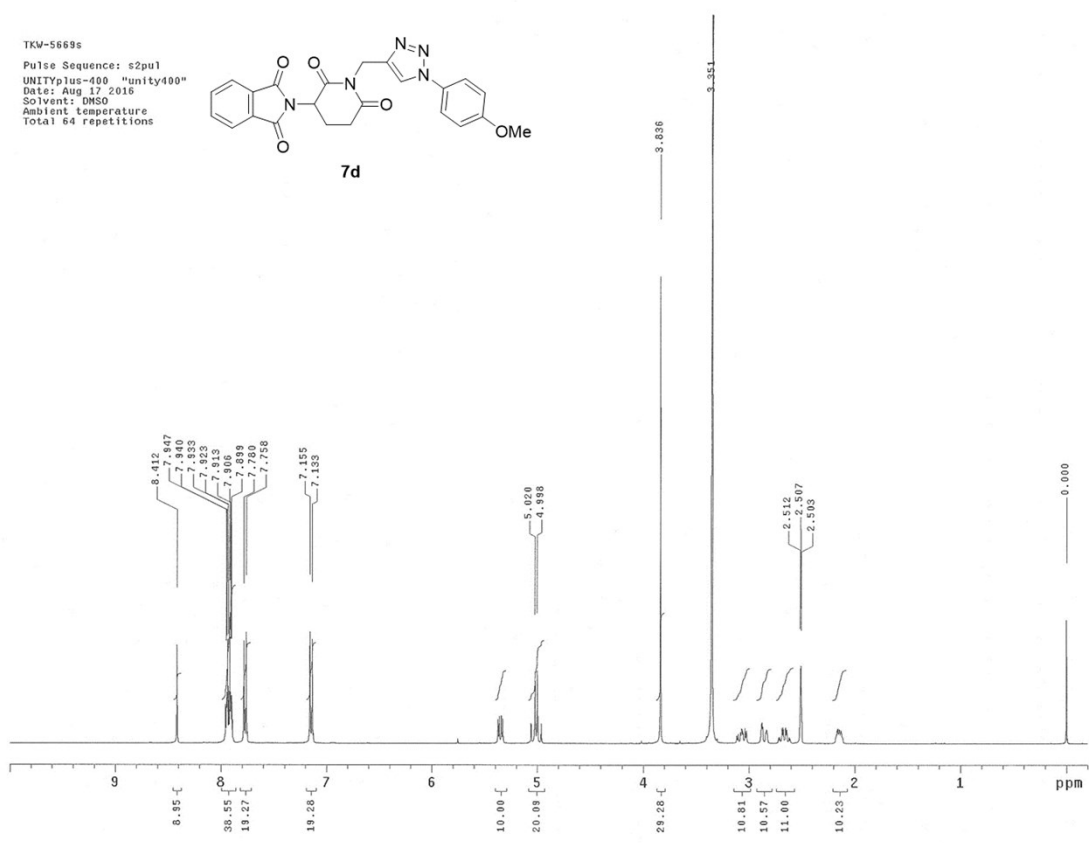

TKW-5669s  
Pulse Sequence: s2pul  
UNITYplus-400 "unity400"  
Date: Aug 17 2018  
Solvent: DMSO  
Ambient temperature  
Total 3440 repetitions

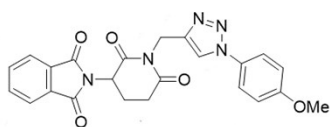

7d

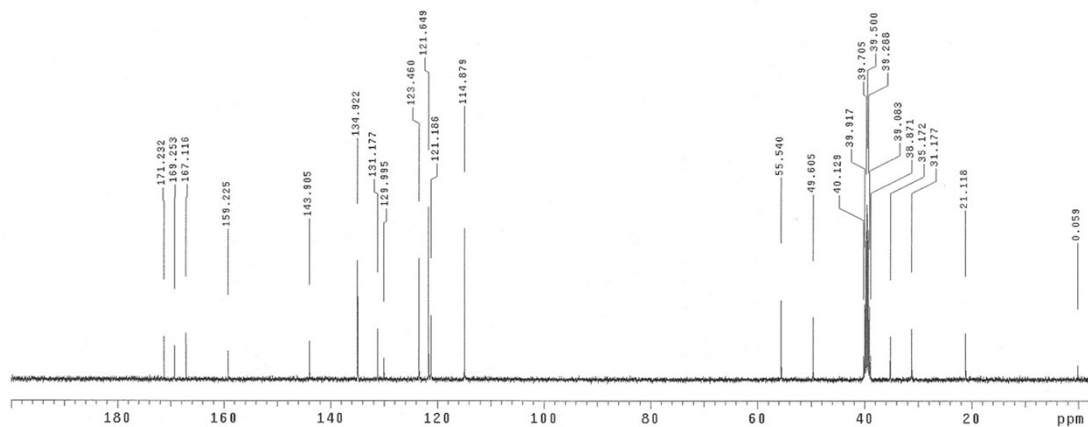

TKW-5924x  
Pulse Sequence: s2pul  
UNITYplus-400 "unity400"  
Date: Oct 24 2018  
Solvent: DMSO  
Ambient temperature  
Total 80 repetitions

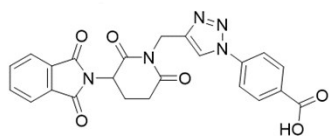

7e

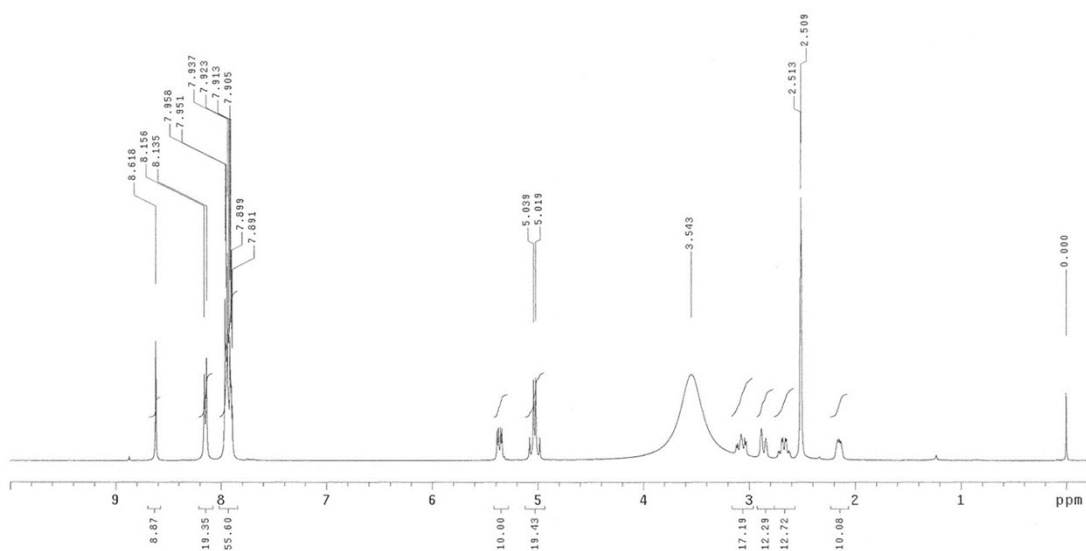

TKW-5924x  
 Pulse Sequence: s2pu1  
 UNITYplus-400 "unity400"  
 Date: Oct 24 2018  
 Solvent: DMSO  
 Ambient temperature  
 Total 5392 repetitions

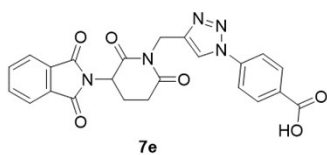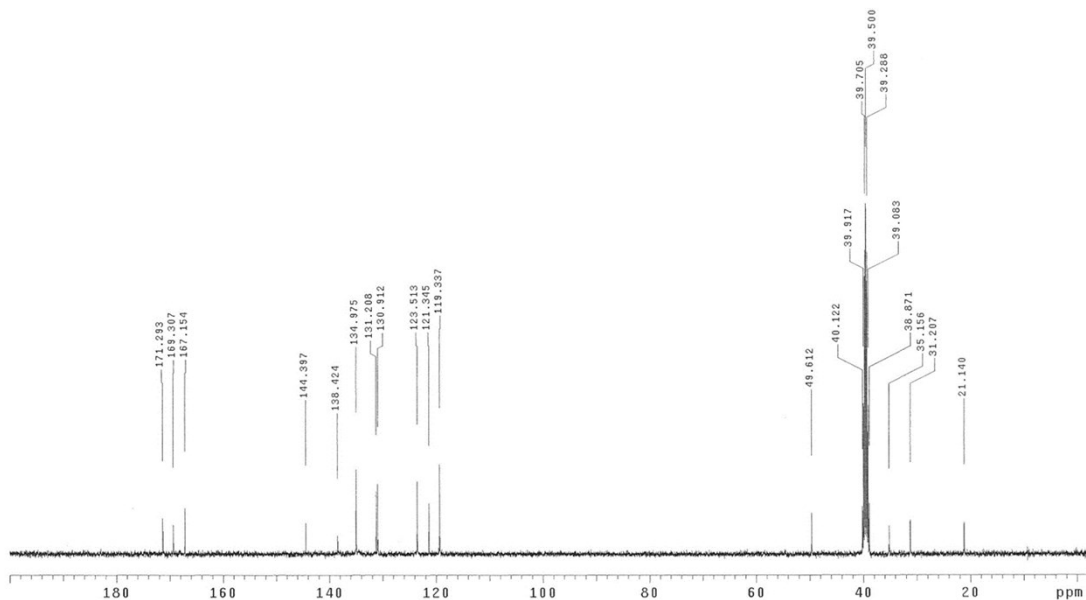

TKW-5670t  
 Pulse Sequence: s2pu1  
 UNITYplus-400 "unity400"  
 Date: Aug 17 2016  
 Solvent: DMSO  
 Ambient temperature  
 Total 32 repetitions

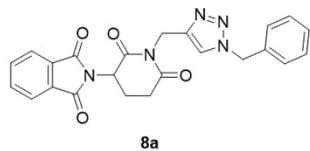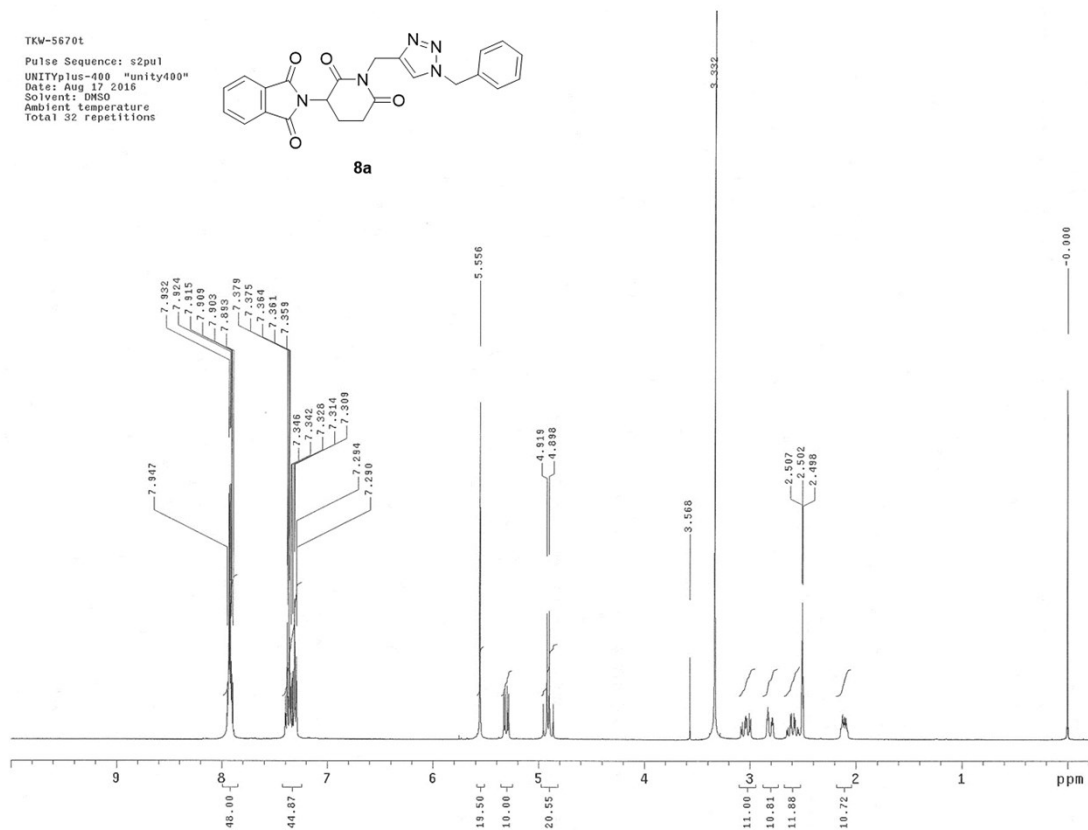

TKW-5670t  
 Pulse Sequence: s2pul  
 UNITYplus-400 "unity400"  
 Date: Aug 17 2016  
 Solvent: DMSO  
 Ambient temperature  
 Total 1664 repetitions

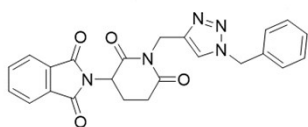

8a

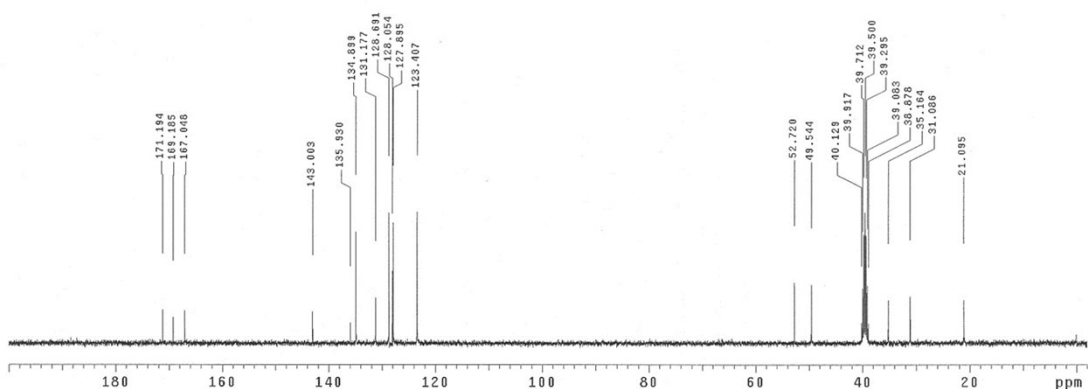

TKW-5671u  
 Pulse Sequence: s2pul  
 UNITYplus-400 "unity400"  
 Date: Aug 17 2016  
 Solvent: DMSO  
 Ambient temperature  
 Total 64 repetitions

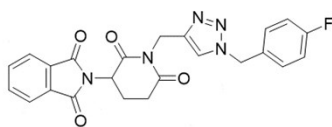

8c

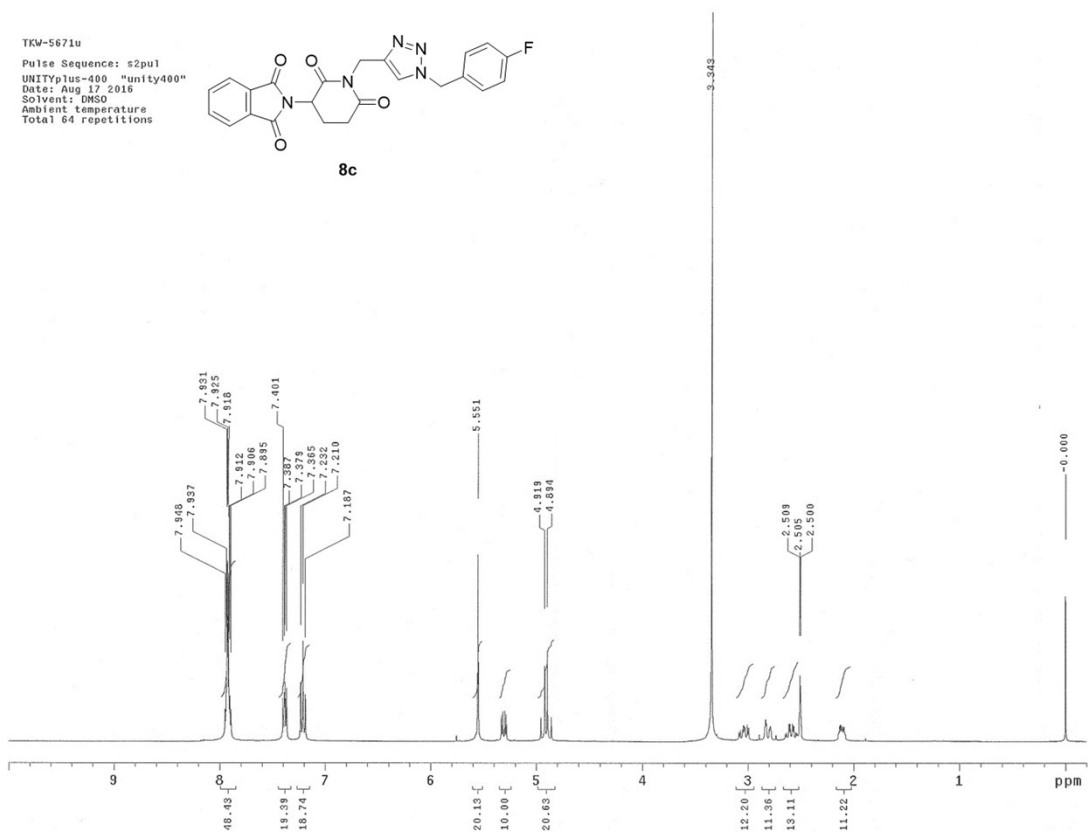

TKW-5671u

Pulse Sequence: s2pu1  
UNITYplus-400 "unity400"  
Date: Aug 17 2016  
Solvent: DMSO  
Ambient temperature  
Total 4112 repetitions

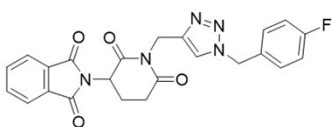

8c

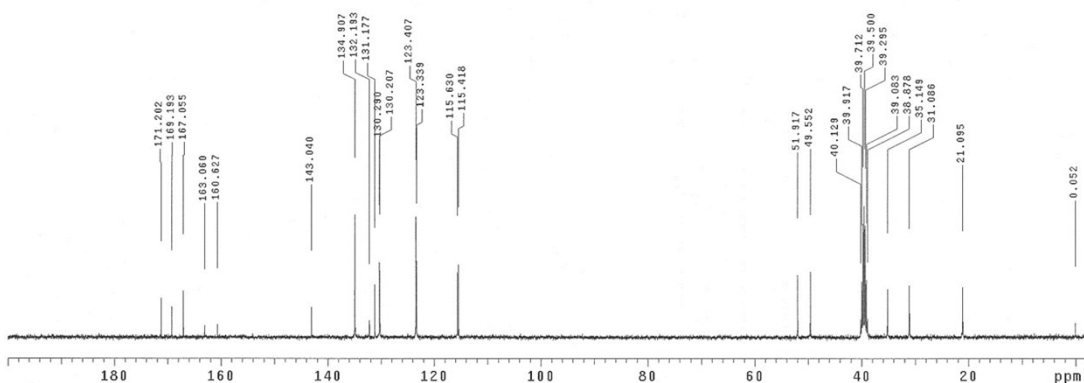

TKW-5672v

Pulse Sequence: s2pu1  
UNITYplus-400 "unity400"  
Date: Aug 17 2016  
Solvent: DMSO  
Ambient temperature  
Total 64 repetitions

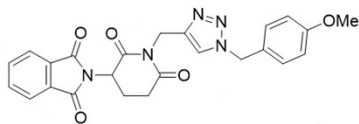

8d

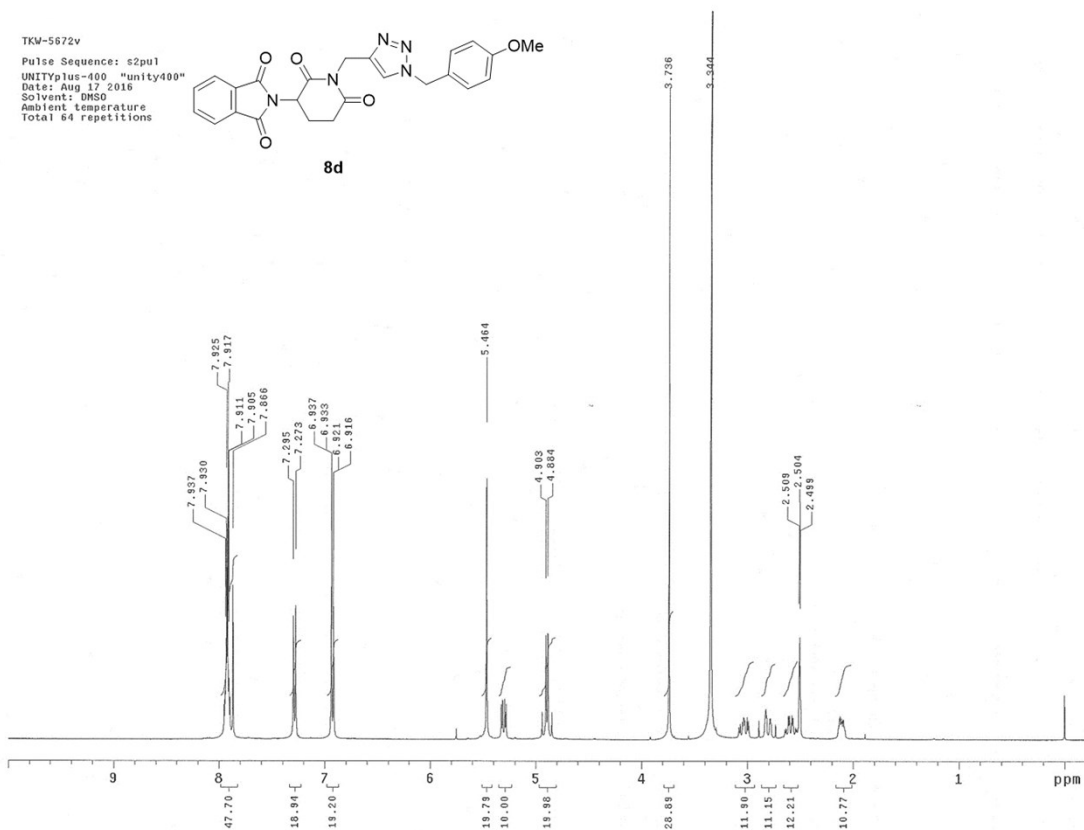

TKW-5672v

Pulse Sequence: s2pul  
UNITYplus-400 "unity400"  
Date: Aug 17 2016  
Solvent: DMSO  
Ambient temperature  
Total 3248 repetitions

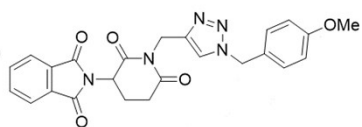

8d

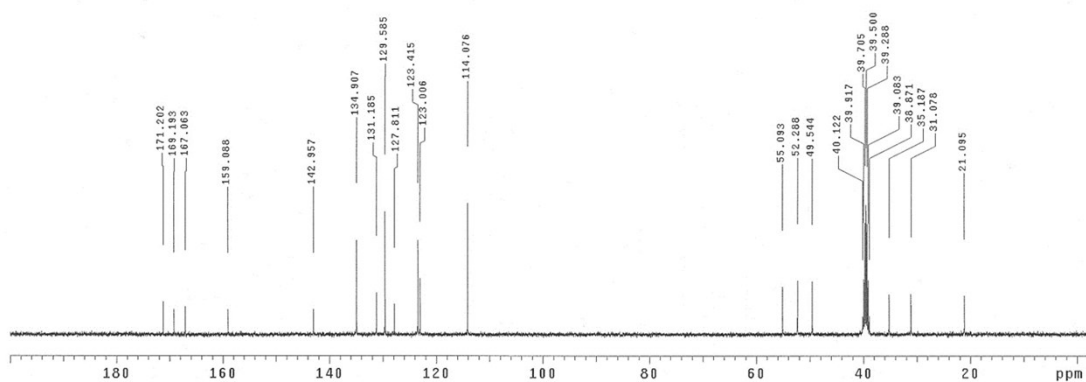

TKW-6151a

Pulse Sequence: s2pul  
UNITYplus-400 "unity400"  
Date: Oct 25 2018  
Solvent: DMSO  
Ambient temperature  
Total 32 repetitions

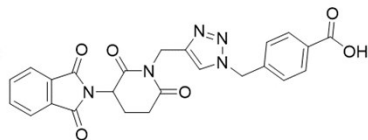

8e

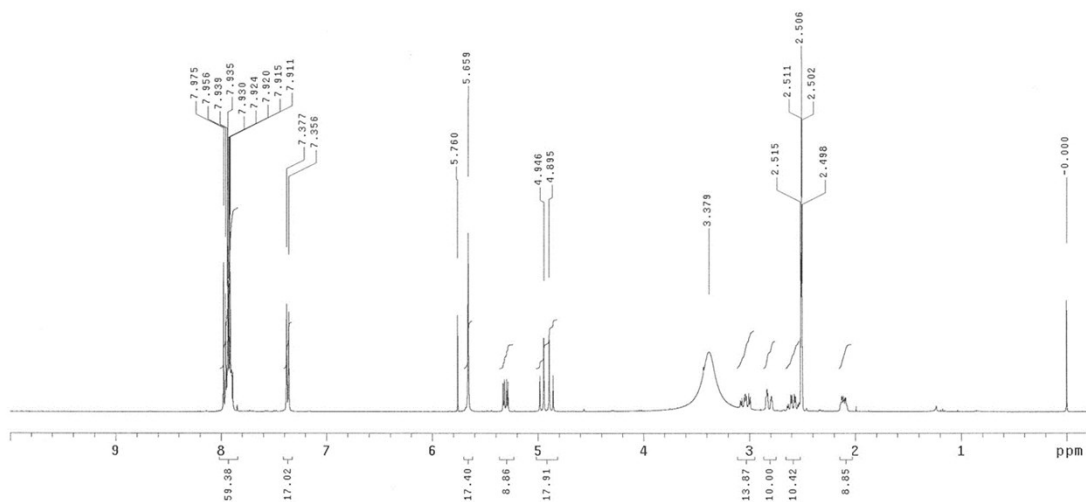

TKW-6151a  
Pulse Sequence: s2pu1  
UNITYplus-400 "unity400"  
Date: Oct 25 2018  
Solvent: DMSO  
Ambient temperature  
Total 3056 repetitions

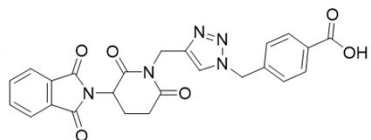

8e

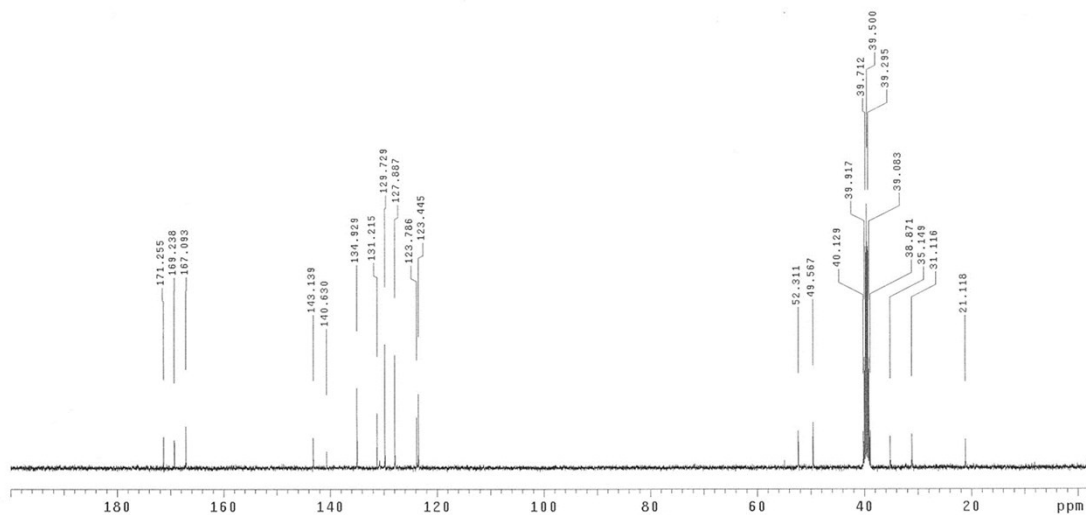

TKW-5679w  
Pulse Sequence: s2pu1  
UNITYplus-400 "unity400"  
Date: Oct 5 2018  
Solvent: DMSO  
Ambient temperature  
Total 64 repetitions

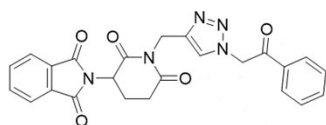

9a

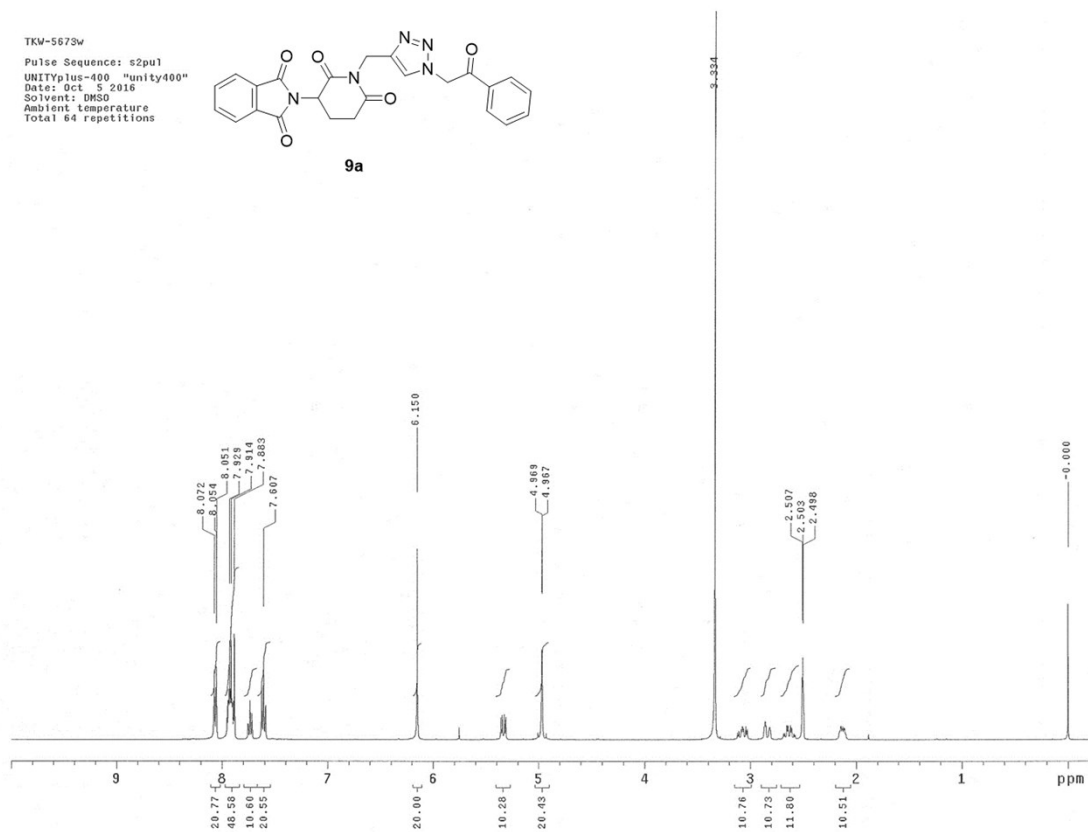



TKW-5673w

Pulse Sequence: s2pu1  
UNITYplus-400 "unity400"  
Date: Oct 5 2016  
Solvent: DMSO  
Ambient temperature  
Total 2016 repetitions

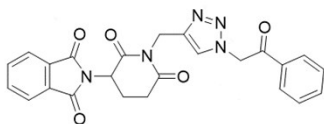

9a

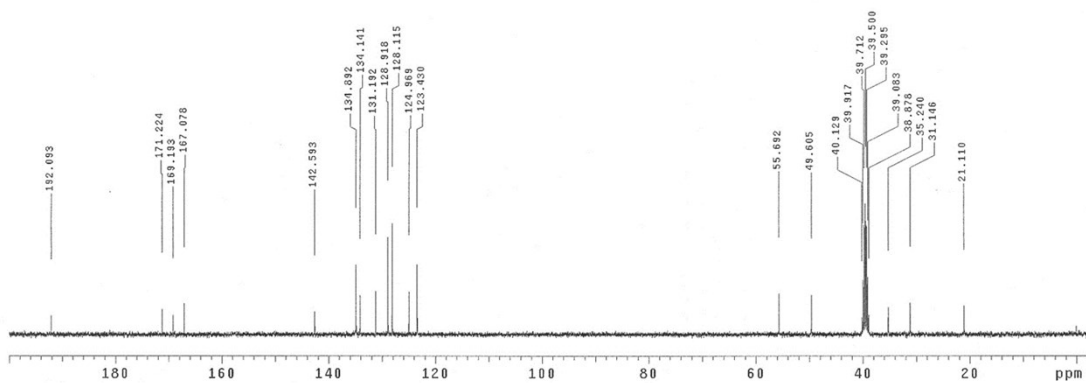

TKW-5674x

Pulse Sequence: s2pu1  
UNITYplus-400 "unity400"  
Date: Oct 5 2016  
Solvent: DMSO  
Ambient temperature  
Total 64 repetitions

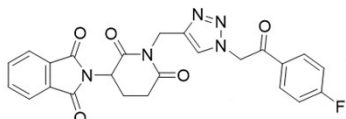

9c

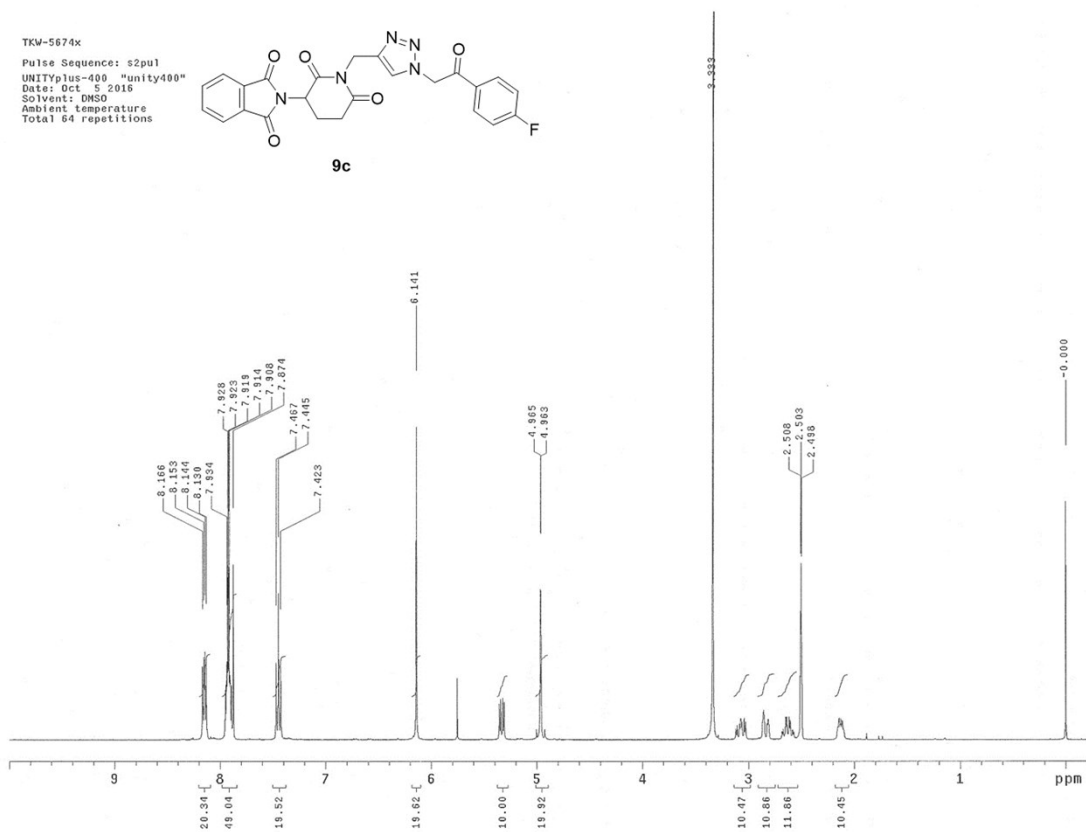

TKV-5674x

Pulse Sequence: s2pu1  
UNITYplus-400 "unity400"  
Date: Oct 5 2016  
Solvent: DMSO  
Ambient temperature  
Total 7216 repetitions

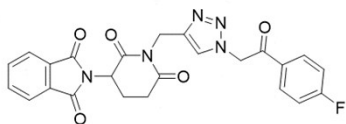

9c

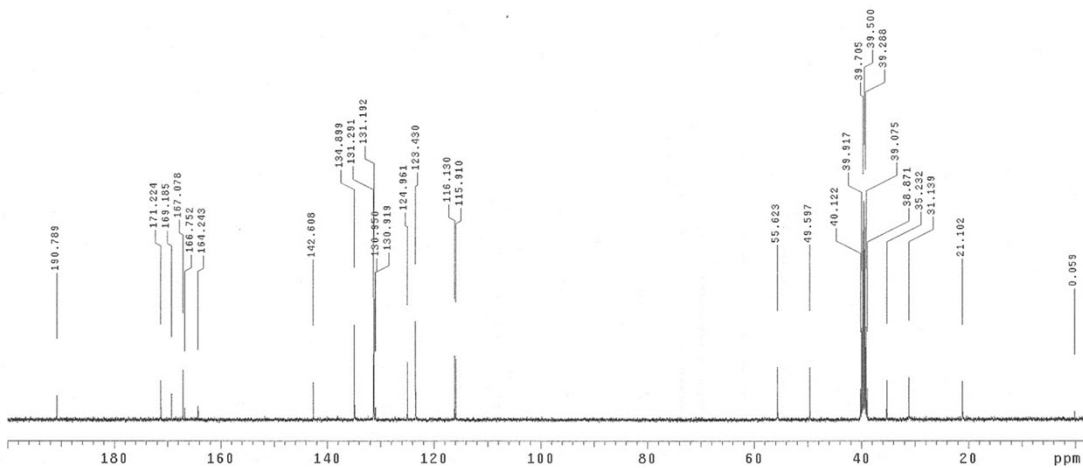

TKV-5675y

Pulse Sequence: s2pu1  
UNITYplus-400 "unity400"  
Date: Oct 5 2016  
Solvent: DMSO  
Ambient temperature  
Total 32 repetitions

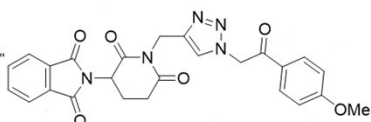

9d

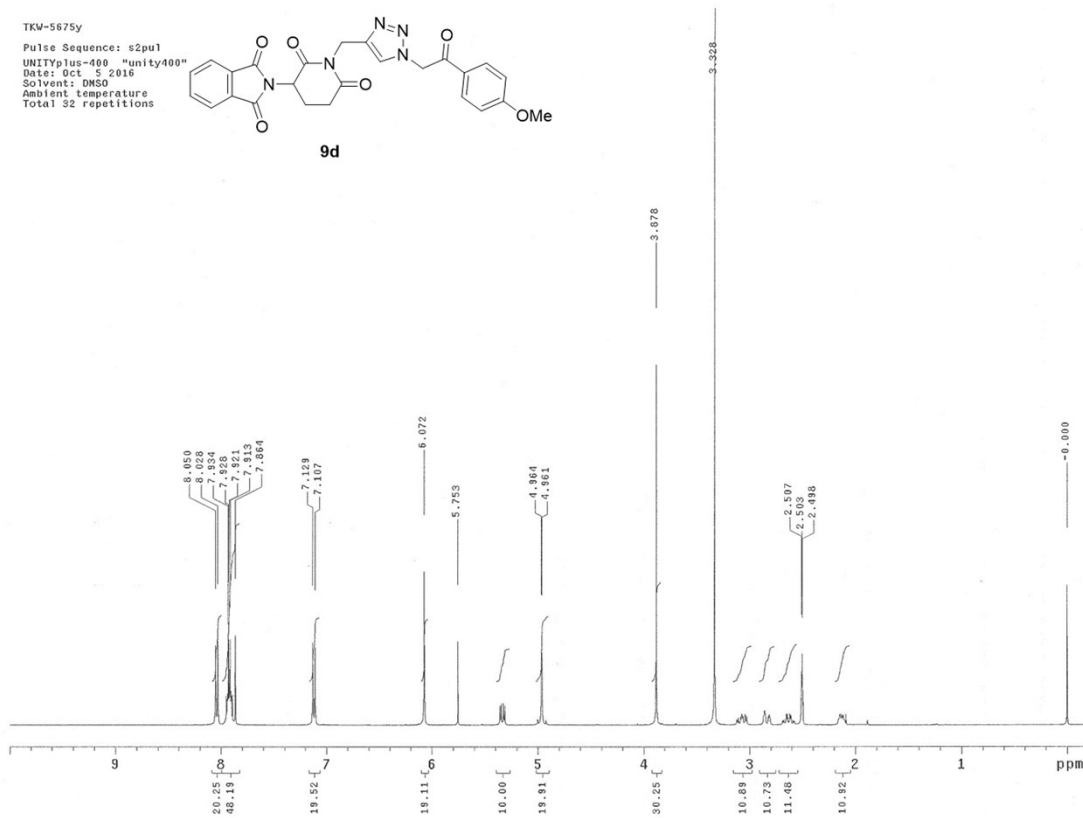

TKW-5675y

Pulse Sequence: s2pu1  
UNITYplus-400 "unity400"  
Date: Oct 5 2016  
Solvent: DMSO  
Ambient temperature  
Total 2048 repetitions

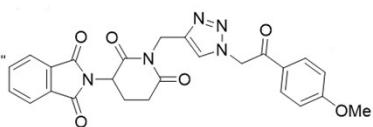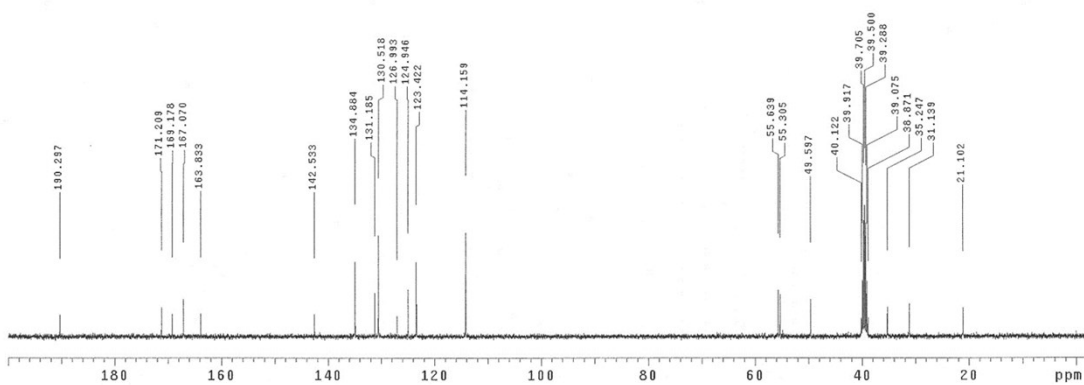

TKW-6153C

Pulse Sequence: s2pu1  
UNITYplus-400 "unity400"  
Date: Jan 10 2019  
Solvent: DMSO  
Ambient temperature  
Total 64 repetitions

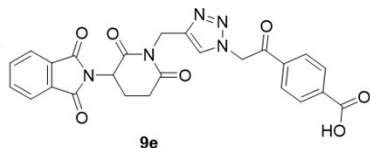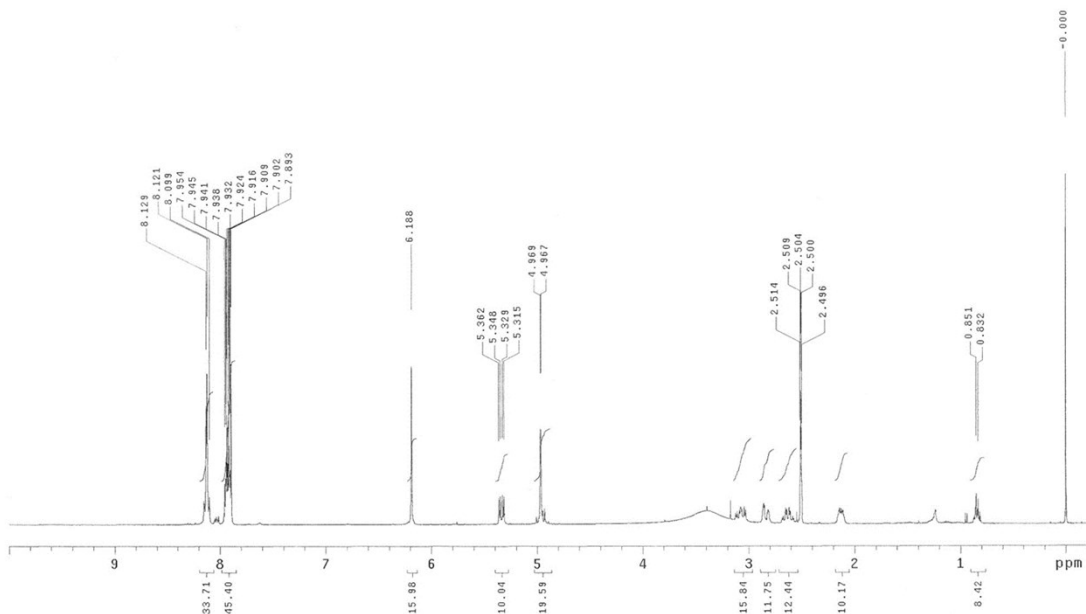

TKV-6153C

Pulse Sequence: s2pu1  
UNITYplus-400 "unity400"  
Date: Jan 10 2019  
Solvent: DMSO  
Ambient temperature  
Total 4656 repetitions

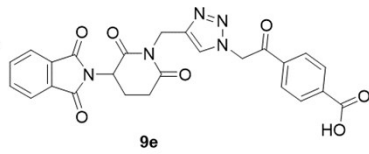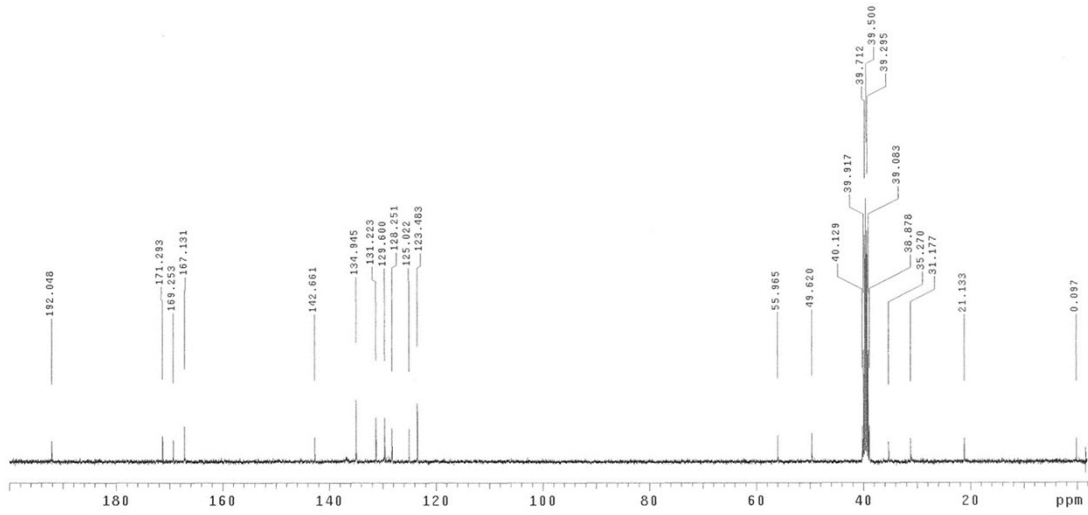

TKV-5676z

Pulse Sequence: s2pu1  
UNITYplus-400 "unity400"  
Date: Oct 5 2016  
Solvent: DMSO  
Ambient temperature  
Total 32 repetitions

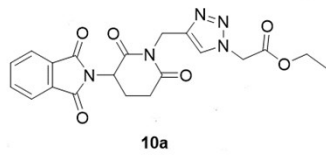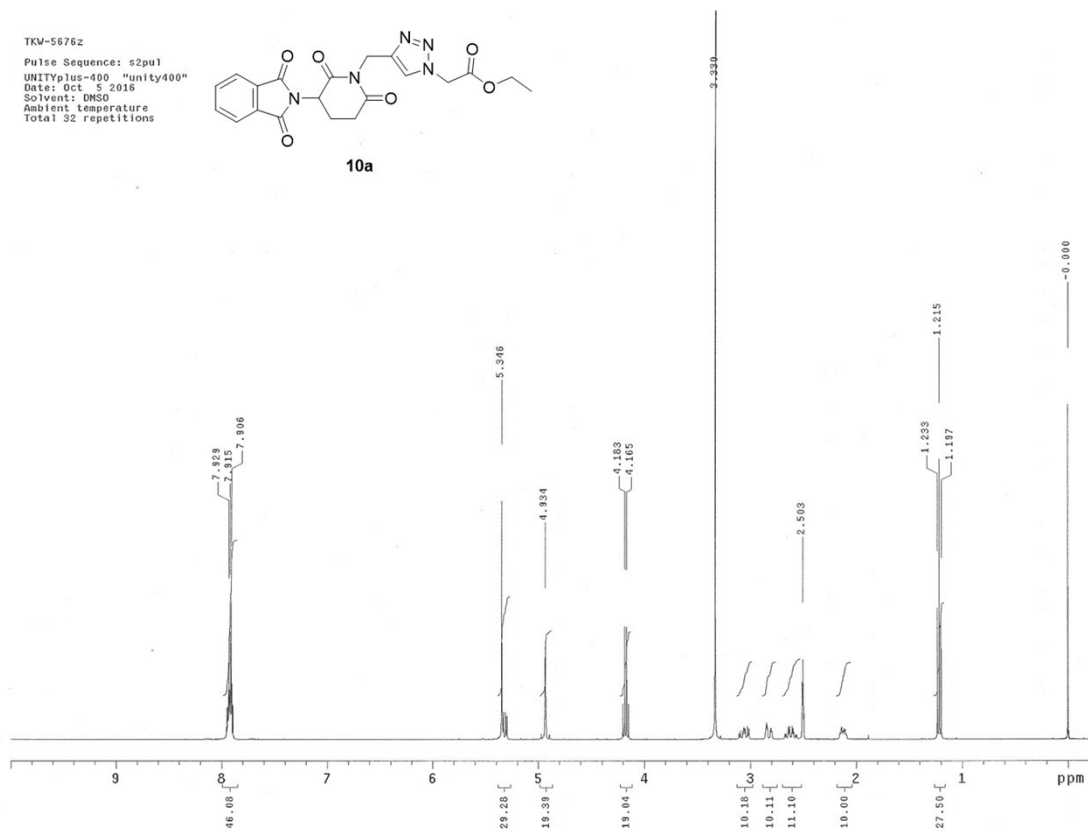

TKW-5676z

Pulse Sequence: s2pu1  
UNITYplus-400 "unity400"  
Date: Oct 5 2016  
Solvent: DMSO  
Ambient temperature  
Total 5752 repetitions

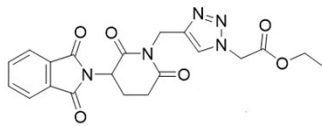

10a

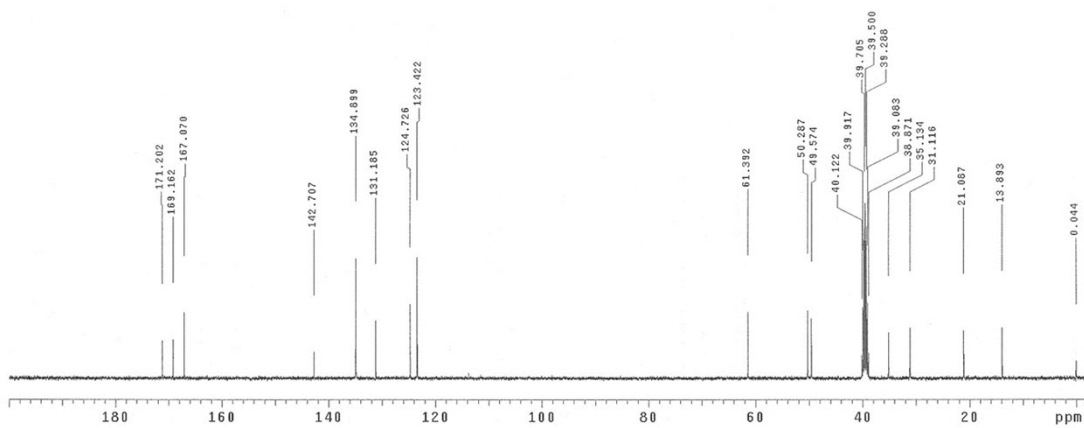

TKW-5677a

Pulse Sequence: s2pu1  
UNITYplus-400 "unity400"  
Date: Aug 25 2016  
Solvent: DMSO  
Ambient temperature  
Total 256 repetitions

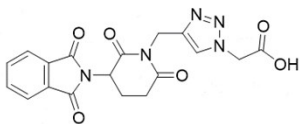

10b

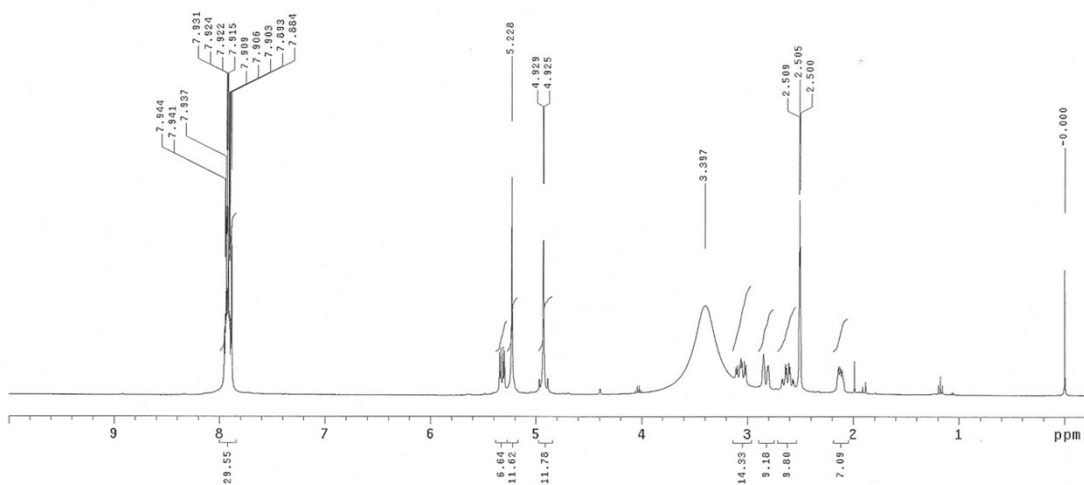

TKW-5677a

Pulse Sequence: s2pul  
UNITYplus-400 "unity400"  
Date: Aug 25 2016  
Solvent: DMSO  
Ambient temperature  
Total 27936 repetitions

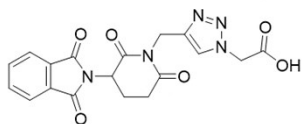

10b

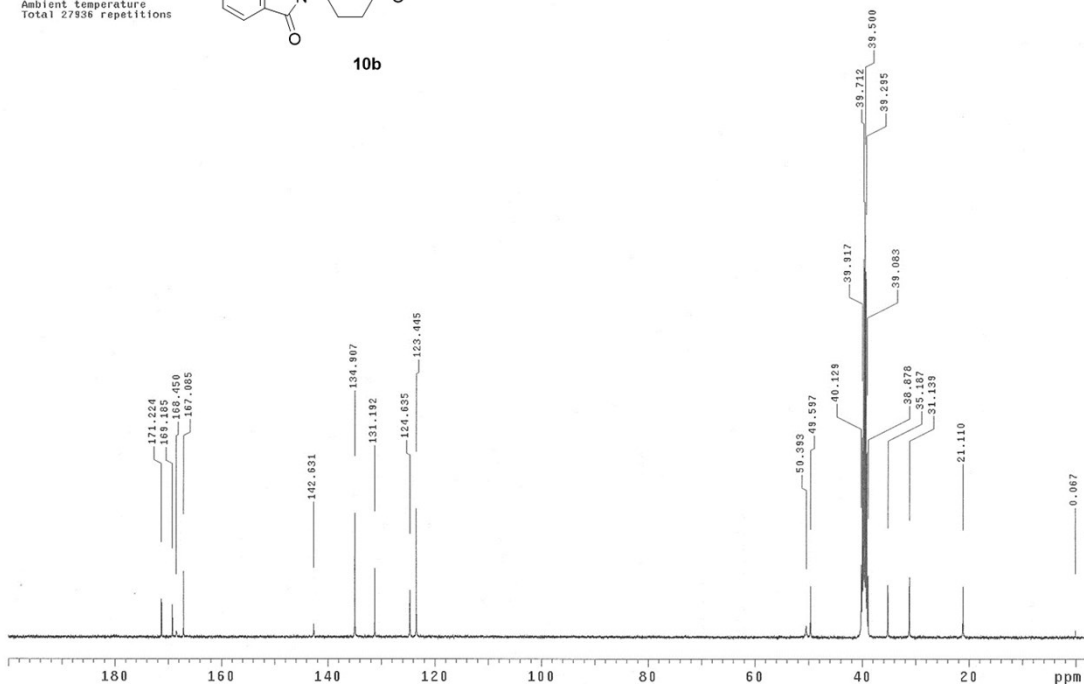

TKW-6154d

Pulse Sequence: s2pul  
UNITYplus-400 "unity400"  
Date: Jan 10 2019  
Solvent: DMSO  
Ambient temperature  
Total 32 repetitions

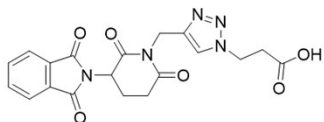

10c

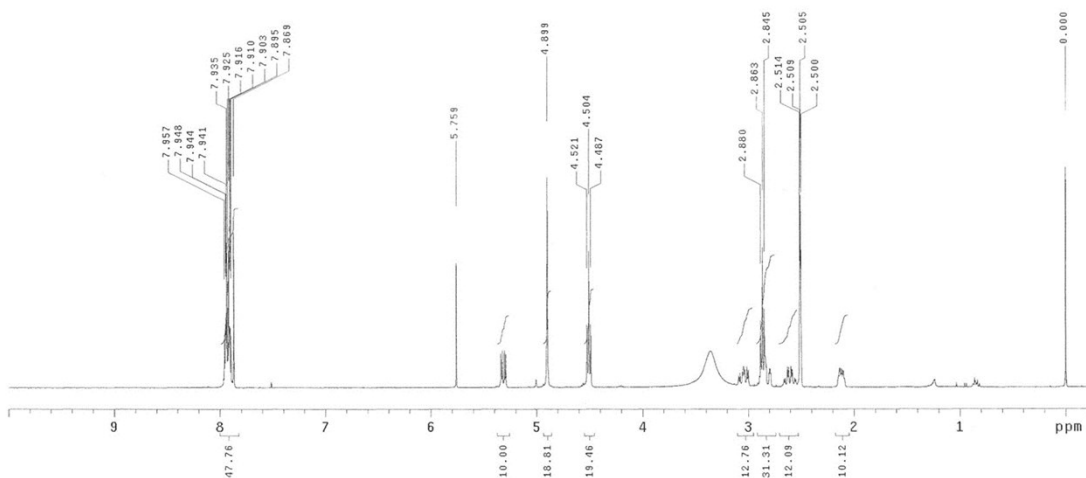

TKW-6154d  
Pulse Sequence: s2pu1  
UNITYplus-400 "unity400"  
Date: Jan 10 2019  
Solvent: DMSO  
Ambient temperature  
Total 6080 repetitions

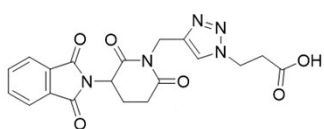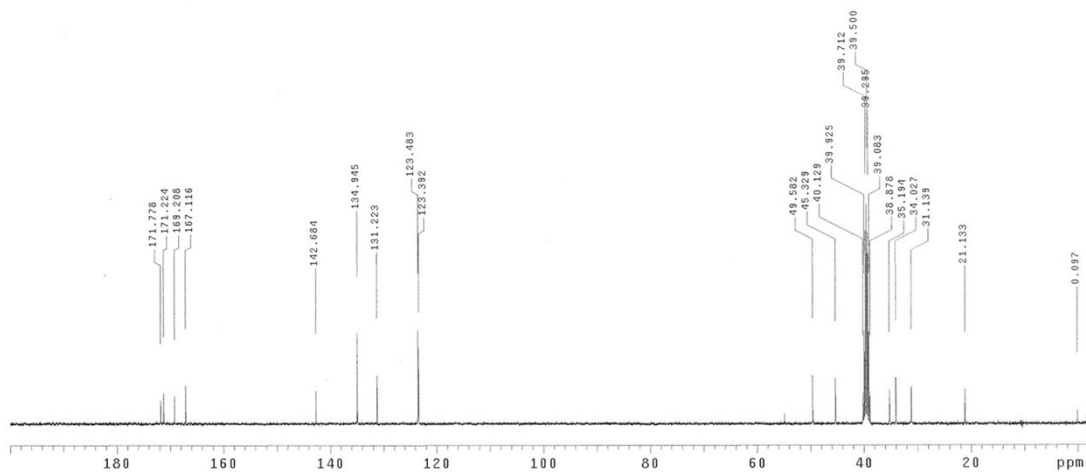

TKW-6155e  
Pulse Sequence: s2pu1  
Mercury-400BB "MerPlus400"  
Date: Dec 13 2018  
Solvent: dms0  
Ambient temperature  
Total 64 repetitions

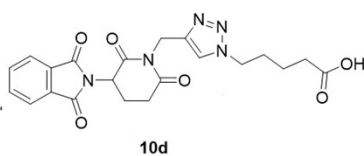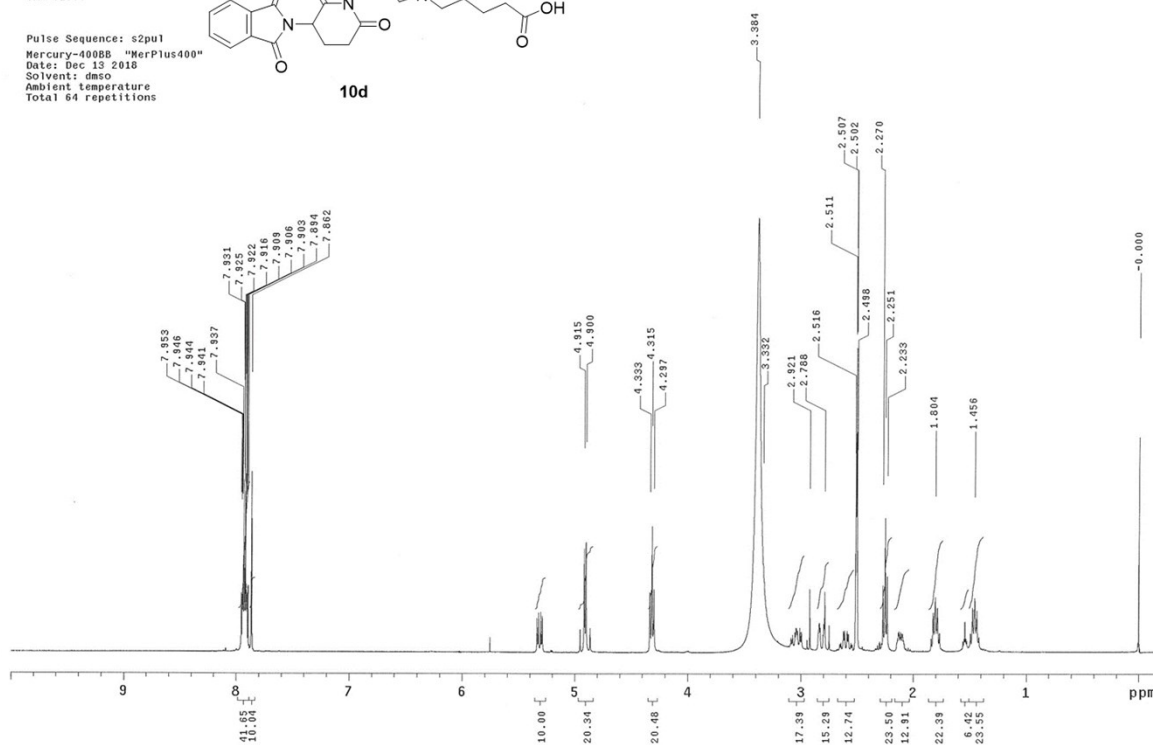

TKW-6155e

Pulse Sequence: s2pu1  
Mercury-400BB "MerPlus400"  
Date: Dec 13 2018  
Solvent: dms0  
Ambient temperature  
Total 1868 repetitions

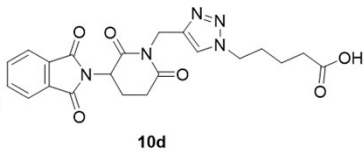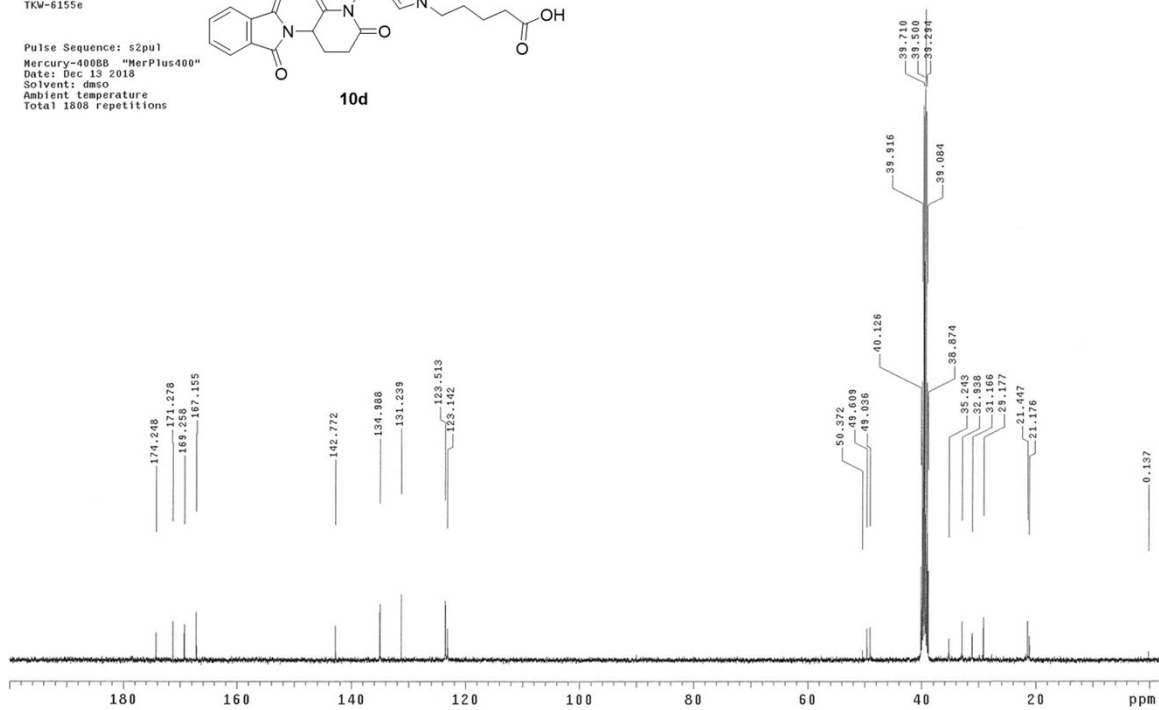

TKW-6156f

Pulse Sequence: s2pu1  
Mercury-400BB "MerPlus400"  
Date: Dec 14 2018  
Solvent: dms0  
Ambient temperature  
Total 32 repetitions

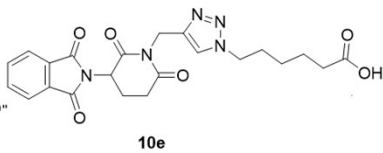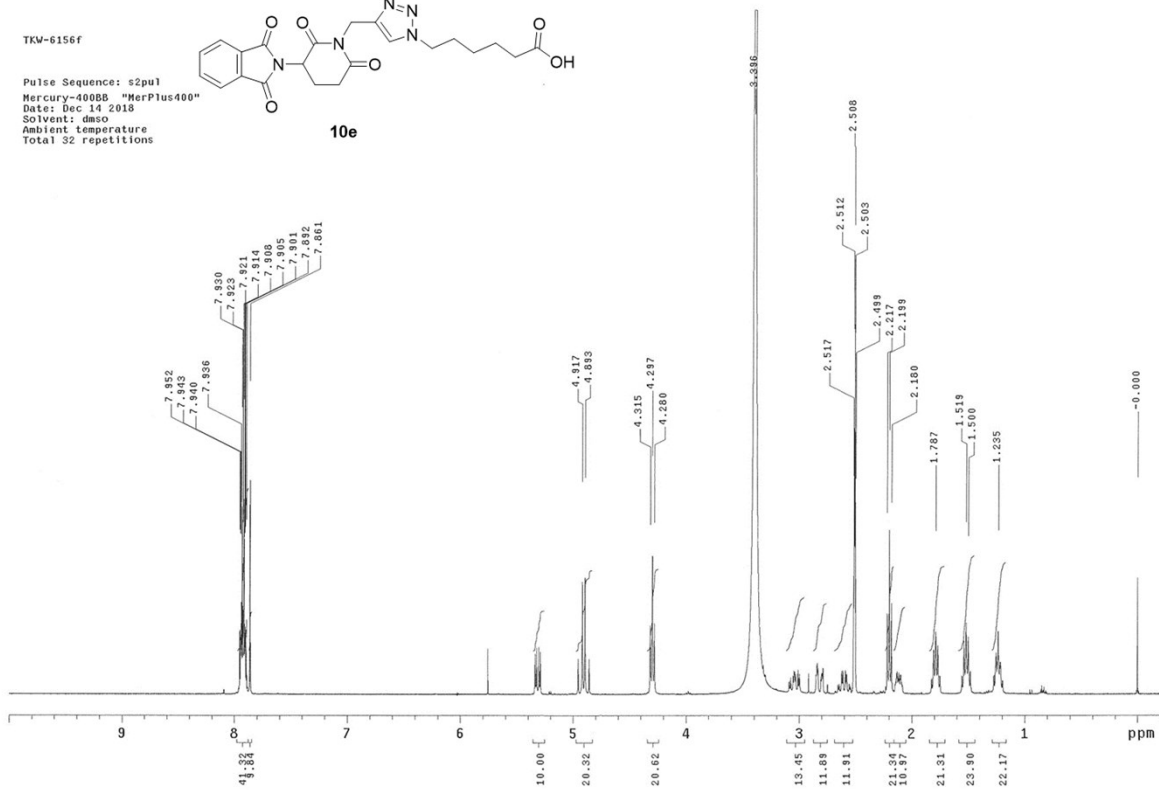



TKW-6156f

Pulse Sequence: s2pu1  
Mercury-40088 "MerPlus400"  
Date: Dec 14 2018  
Solvent: dms  
Ambient temperature  
Total 7040 repetitions

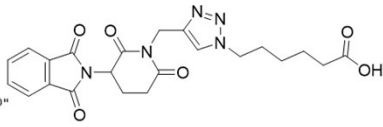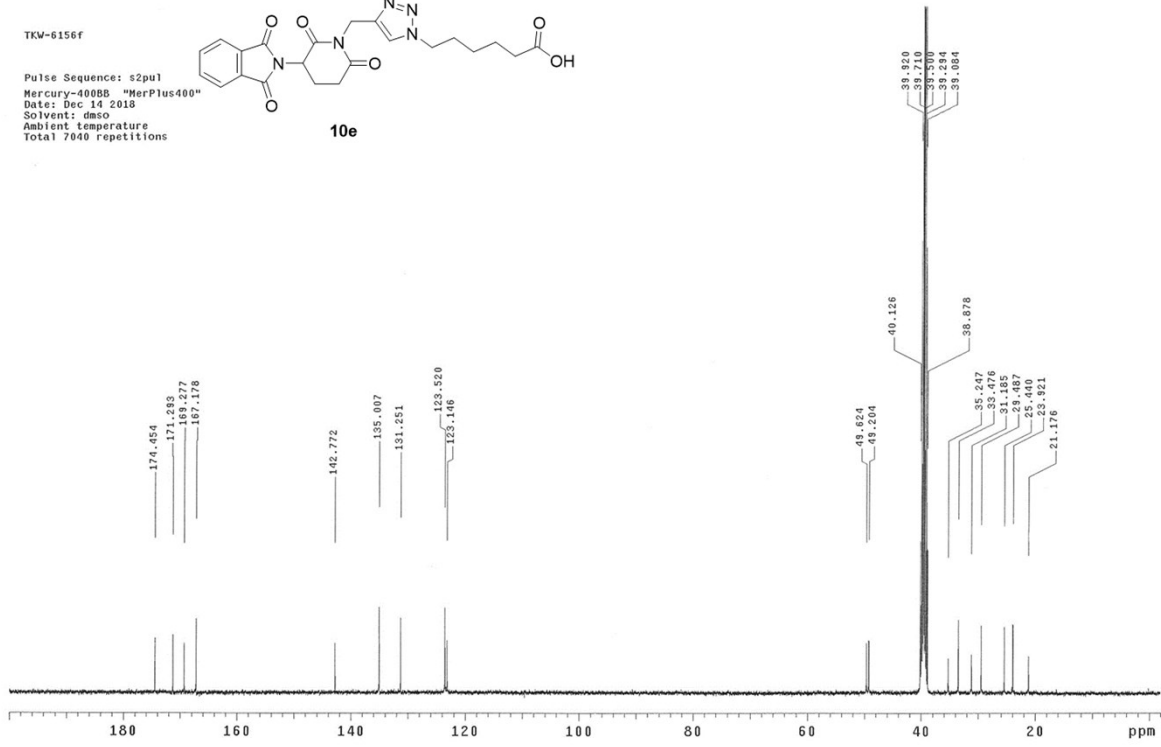

Supplement: d0nj03139a1.pdf [file d0nj03139a1.pdf]
